# Supplementary material
Source: Springer Nature journal article supplement (https://www.springermedizin.de/resource/supplementary/12936_2010_1726_MOESM2_ESM.pdf/9541558)
Supplement: MOESM2 [file 9541558]

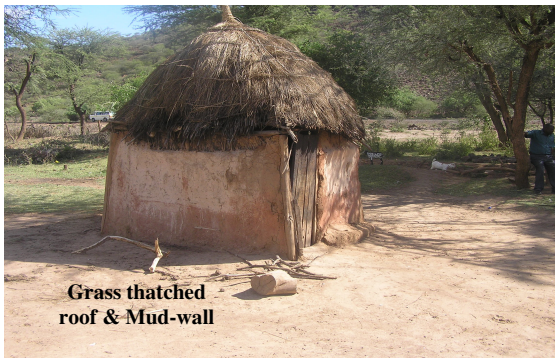

**Grass thatched roof & Mud-wall**

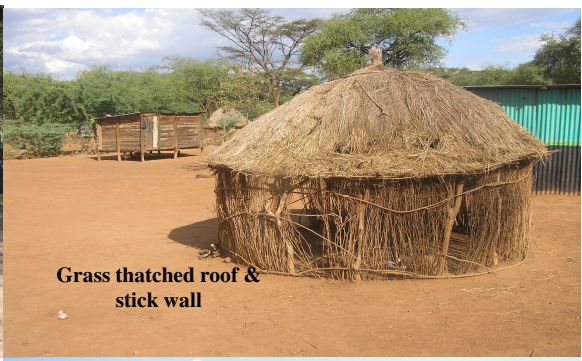

**Grass thatched roof & stick wall**

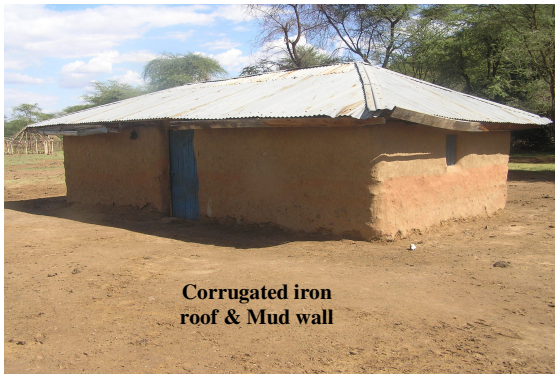

**Corrugated iron roof & Mud wall**

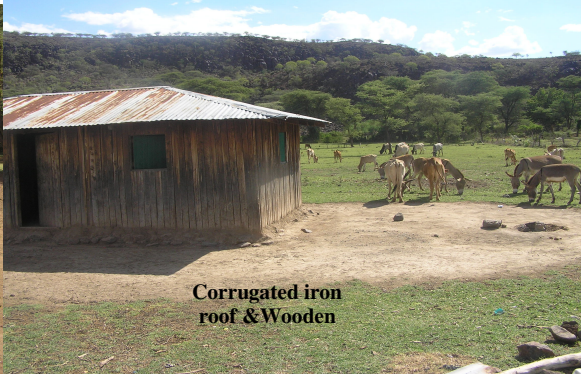

**Corrugated iron roof & Wooden**

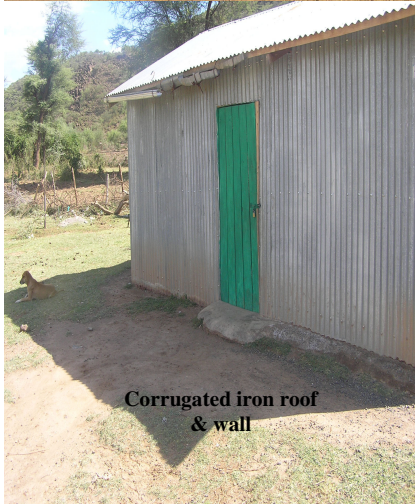

**Corrugated iron roof & wall**

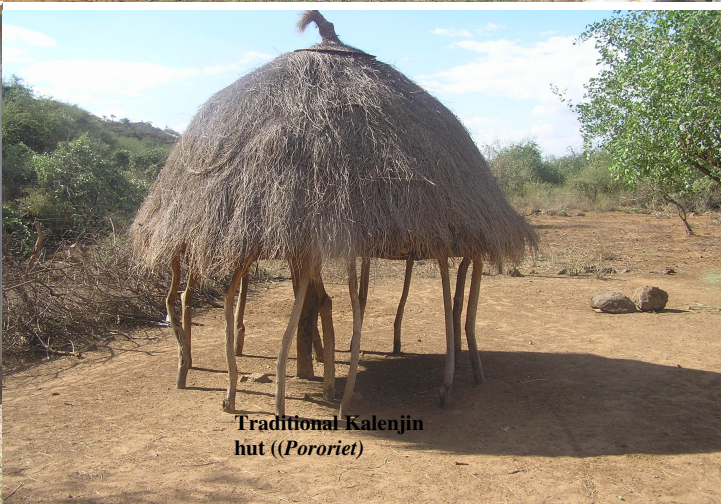

**Traditional Kalenjin hut ((Pororiet)**

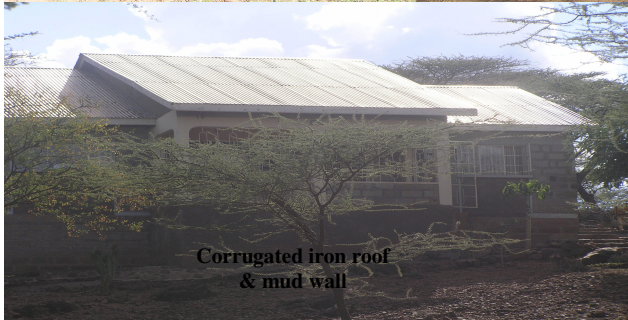

**Corrugated iron roof & mud wall**
